# Supplementary material for: Diverse molecular signatures for ribosomally ‘active’ Perkinsea in marine sediments
Source: PubMed Central journal article supplement (PMC4044210; doi:10.1186/1471-2180-14-110), 2014-04-29

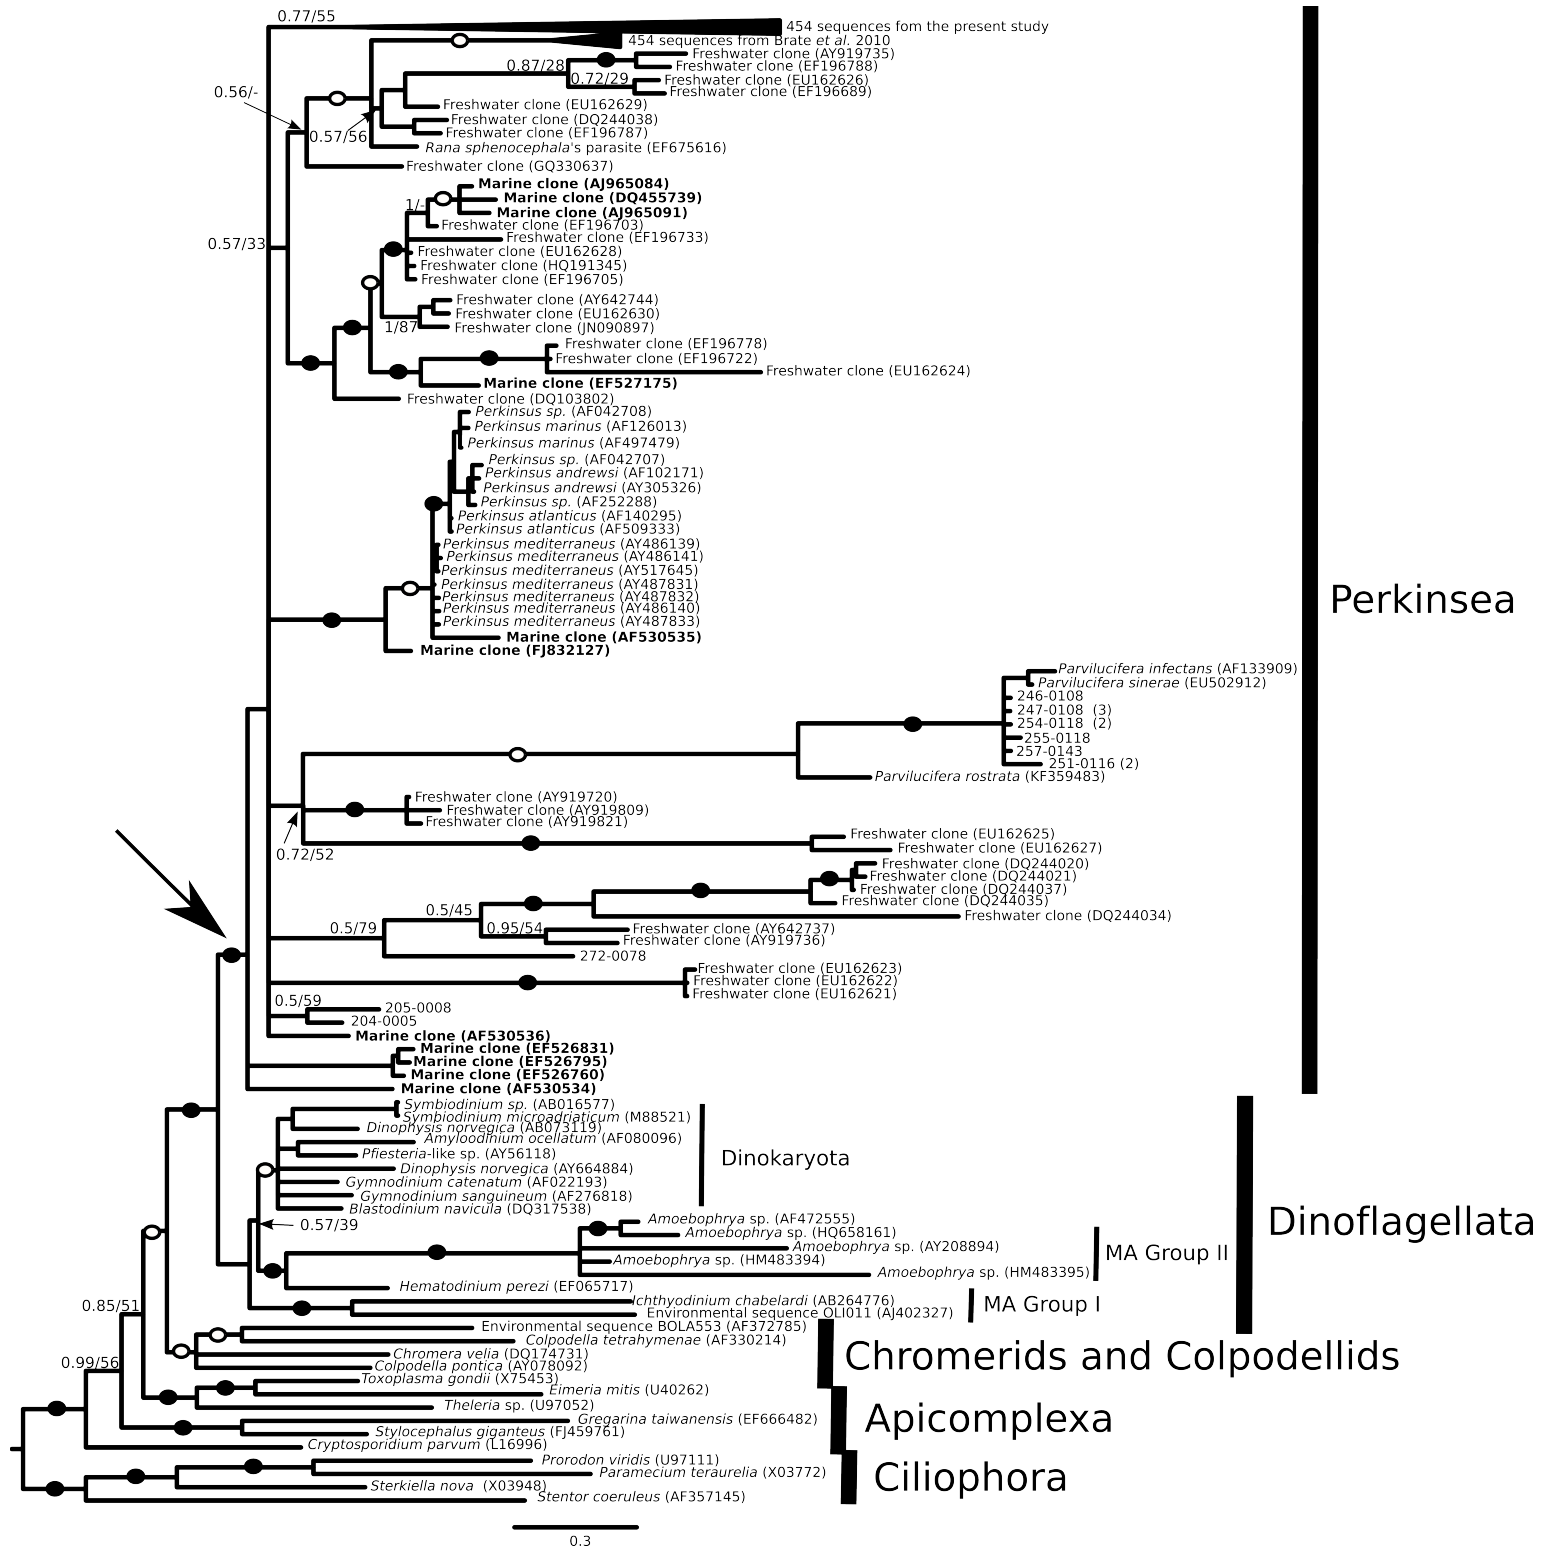

Supplement: 1471-2180-14-110-S1.pdf [file 1471-2180-14-110-S1.pdf]
